# Supplementary material for: Enhancing Glucose Biosensing with Graphene Oxide and Ferrocene-Modified Linear Poly(ethylenimine)
Source: MDPI journal article supplement (doi:10.3390/bios14040161), 2024-03-28
Supplement: s1 [file s1]

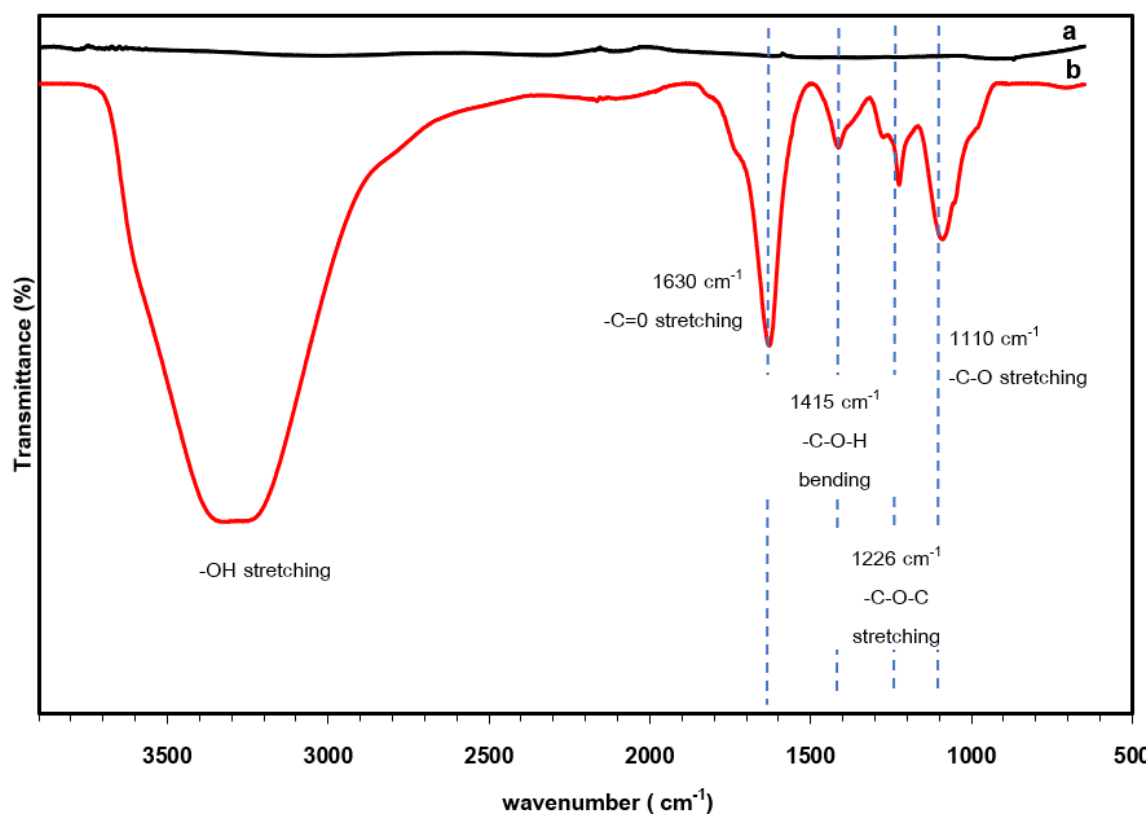

**Figure S1.** FT-IR spectra of a) graphite powder and b) GO.

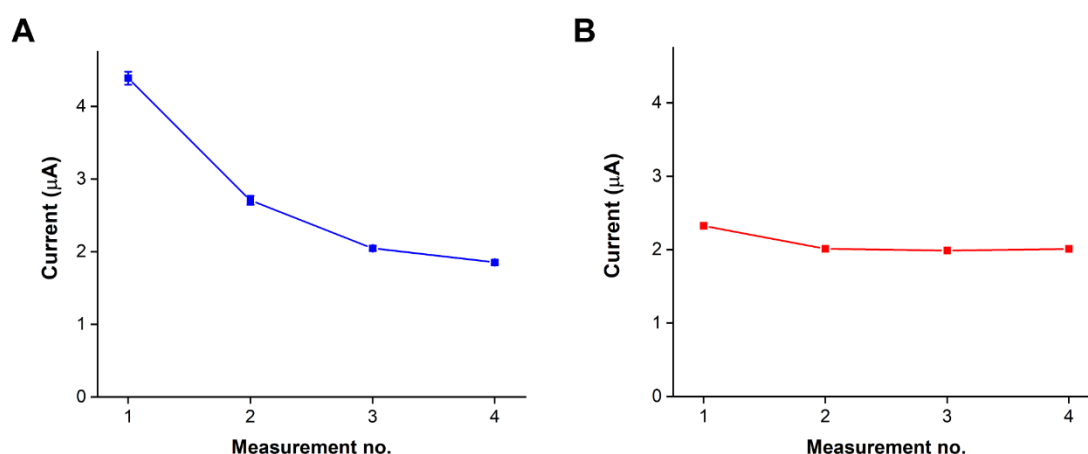

**Figure S2.** Comparison of the electrodes current responses to repeated measurements of 40 mM glucose. A) 0.25 μg EDGE, B) 0.50 μg EDGE. (5 μg GO, 5 μg GDH, 30 μg LPEI-Fc). Measurements were performed at an applied potential of 0.35 V in 5mM NAD<sup>+</sup> in PBS buffer pH 7.4, air-equilibrated electrolyte with the flow rate of 1.0 mL/min.

**Table S1.** Amperometric signal values of 10 mM glucose obtained from five independent biosensors for reproducibility and repeatability studies.

| Electrode no.             | Current ( $\mu\text{A}$ ) | %RSD (from the same sensor) |
|---------------------------|---------------------------|-----------------------------|
| 1                         | 1.378                     | 8.37                        |
|                           | 1.616                     |                             |
|                           | 1.576                     |                             |
| 2                         | 1.260                     | 1.99                        |
|                           | 1.217                     |                             |
|                           | 1.217                     |                             |
| 3                         | 1.636                     | 5.93                        |
|                           | 1.522                     |                             |
|                           | 1.713                     |                             |
| 4                         | 1.588                     | 6.10                        |
|                           | 1.407                     |                             |
|                           | 1.525                     |                             |
| 5                         | 1.408                     | 4.16                        |
|                           | 1.345                     |                             |
|                           | 1.462                     |                             |
| <i>Average</i>            | <b>1.458</b>              | <b>5.31</b>                 |
| <i>Standard deviation</i> | <b>0.156</b>              |                             |
| <i>%RSD</i>               | <b>10.70</b>              |                             |

**Table S2.** Effect of potentially interfering substances on the FI-GDH/LPEI-Fc/GO/SPE amperometric response to 10 mM glucose.

| Substance            | %deviation |
|----------------------|------------|
| 100 mM Fructose      | 0.11       |
| 100 mM Sucrose       | 0.91       |
| 100 mM Xylose        | 1.21       |
| 100 mM Ribose        | 2.85       |
| 100 mM Caffeine      | 1.14       |
| 1.0 mM Ascorbic acid | 15.79      |
